# Supplementary material
Source: publisher figshare collection journal article supplement (https://plos.figshare.com/articles/dataset/_/5338825)
Supplement: Supplementary file [file 1]

**S1 Table. List of primers used in this study**

| Primer             | Sequence                        | Use                         | Target          |
|--------------------|---------------------------------|-----------------------------|-----------------|
| At1-MMP-F          | CGATTCGGTTACGTCAATGAT           | Expression analysis         | <i>At1-MMP</i>  |
| At1-MMP-R          | CACGGTTCCATTTCGGTTTA            | Expression analysis         | <i>At1-MMP</i>  |
| At2-MMP-F          | CAACGGTACTTCGTTGATGC            | Expression analysis         | <i>At2-MMP</i>  |
| At2-MMP-R          | GAAGTTTAACGCGGTGACG             | Expression analysis         | <i>At2-MMP</i>  |
| At3-MMP-F          | GCGGTAGGAAAACCTTCGAG            | Expression analysis         | <i>At3-MMP</i>  |
| At3-MMP-R          | TGATGTCAGAGGTCGAGA ACC          | Expression analysis         | <i>At3-MMP</i>  |
| At4-MMP-F          | CGGTGATCCCAGTATCCTTC            | Expression analysis         | <i>At4-MMP</i>  |
| At4-MMP-R          | GCCACAGATTCCAAA TCGAC           | Expression analysis         | <i>At4-MMP</i>  |
| At5-MMP-F          | GCCGAA ACGGAAACGAGA             | Expression analysis         | <i>At5-MMP</i>  |
| At5-MMP-R          | CATGCGCTAATGTTCCCATA            | Expression analysis         | <i>At5-MMP</i>  |
| AtPDF1.2-F         | TGGCTTATTTCTTCACACAACACA        | Expression analysis         | <i>AtPDF1.2</i> |
| AtPDF1.2-R         | AAGATTCAGTGGTCCTGTTGT           | Expression analysis         | <i>AtPDF1.2</i> |
| AtPR1-F            | AGCGATGTTTACGAACCCCA            | Expression analysis         | <i>AtPR1</i>    |
| AtPR1-R            | CCCACGAGGATCATAGTTGCA           | Expression analysis         | <i>AtPR1</i>    |
| AtERF1-F           | CCATTCTCCGGCTTCTCACC            | Expression analysis         | <i>AtERF1</i>   |
| AtERF1-R           | TTCACGGAGCGGTGATCAAA            | Expression analysis         | <i>AtERF1</i>   |
| UBQ-F              | GTTAAGCTCGCTGTTCTTCAGT          | Expression analysis         | <i>AtUBQ5</i>   |
| UBQ-R              | TCAAGCTTCAACTCCTTCTTTC          | Expression analysis         | <i>AtUBQ5</i>   |
| At2-MMP-FL-F       | ATGGATCCAATCCGAAAACCACCATGAG    | Cloning                     | <i>At2-MMP</i>  |
| At2-MMP-FL-R       | CA                              | Cloning                     | <i>At2-MMP</i>  |
| GFP-SalI           | CGCGTCGACCATGGTGAGCAAGGGCGAGGA  | Subcellular localization    | <i>GFP</i>      |
| GFP-XhoI           | CCGCTCGAGGTCTTGACAGCTCGTCCATGC  | Subcellular localization    | <i>GFP</i>      |
| At2-MMP-XhoI       | GACA                            | Subcellular localization    | <i>At2-MMP</i>  |
| MatMMP2-Bam5       | CGGGATCCGACGTGGTCAACGGTACTTCG   | Recombinant protein         | <i>At2-MMP</i>  |
| MatMMP2-Hind3      | CCCAAGCTTGACCGTCGATTCTCCAGGCGGC | Recombinant protein         | <i>At2-MMP</i>  |
| N582450LP          | AGAGTGAAGTTTAACGCGGTG           | T-DNA mutant identification | <i>at2-mmp</i>  |
| N582450RP          | TGAATTCAATAACTCCAAATTTATAAAG    | T-DNA mutant identification | <i>at2-mmp</i>  |
| ( to be continued) |                                 |                             |                 |

| <b>Primer</b> | <b>Sequence</b>              | <b>Use</b>                  | <b>Target</b>  |
|---------------|------------------------------|-----------------------------|----------------|
| GABI_416E03LP | TTTCCATTGGAATCATTACCC        | T-DNA mutant identification | <i>at2-mmp</i> |
| GABI_416E03RP | TTACGTTTCCCTGTCGTGATC        | T-DNA mutant identification | <i>at2-mmp</i> |
| N103532_LP    | TGAGTTGAGAGATCAAACCCG        | T-DNA mutant identification | <i>at3-mmp</i> |
| N103532_RP    | CGACGATATTCTCAAGAACGC        | T-DNA mutant identification | <i>at3-mmp</i> |
| N115923_LP    | GAACCTTCTACCGAGGAATGG        | T-DNA mutant identification | <i>at3-mmp</i> |
| N115923_RP    | TTTAACCGGTCCTTTACCACC        | T-DNA mutant identification | <i>at3-mmp</i> |
| GABI_075C07LP | GTCGAATCCAAATTTGGTGTG        | T-DNA mutant identification | <i>at4-mmp</i> |
| GABI_075C07RP | CATCGGCTAGATTTGTCTGAAG       | T-DNA mutant identification | <i>at4-mmp</i> |
| S032466.54LP  | CTGCCTAATGGGCTATGTCAG        | T-DNA mutant identification | <i>at4-mmp</i> |
| S032466.54RP  | TTGGAGGTGACGTTTGATTTC        | T-DNA mutant identification | <i>at4-mmp</i> |
| S032466.55LP  | AGCCTTTTGGAACGATAGC          | T-DNA mutant identification | <i>at4-mmp</i> |
| S032466.55RP  | ATCTCCCGTAGCTTCTTCTCG        | T-DNA mutant identification | <i>at4-mmp</i> |
| N619909LP     | CGCCGCAGAATAATTTAACAG        | T-DNA mutant identification | <i>at5-mmp</i> |
| N619909RP     | CCTAAGAACTACCATTAATGATGCTC   | T-DNA mutant identification | <i>at5-mmp</i> |
| N593137LP     | CGCCGCAGAATAATTTAACAG        | T-DNA mutant identification | <i>at5-mmp</i> |
| N593137RP     | TGTTGTATGTGATGACTTCGTAAGTC   | T-DNA mutant identification | <i>at5-mmp</i> |
| N656052LP     | AAA TCG TCA GTG CAA TTA CCG  | T-DNA mutant identification | <i>at5-mmp</i> |
| N656052RP     | TCG AAC TAA GCC GAG TGA AAC  | T-DNA mutant identification | <i>at5-mmp</i> |
| N660426LP     | ATGTTACCCGAGAAAAATCC         | T-DNA mutant identification | <i>at5-mmp</i> |
| N660426RP     | TCAGAAAATGGTTTCTCTCGG        | T-DNA mutant identification | <i>at5-mmp</i> |
| Spm32         | TACGAATAAGAGCGTCCATTTAGAGTGA | T-DNA mutant identification | T-DNA border   |
| LBb1          | GCGTGGACCGCTTGCTGCAACT       | T-DNA mutant identification | T-DNA border   |
| GABI_LB       | CCCATTTGGACGTGAATGTAGACAC    | T-DNA mutant identification | T-DNA border   |
| GABI_RB       | CCAAAGATGGACCCCCACCCAC       | T-DNA mutant identification | T-DNA border   |

Note: introduced restriction sites are in bold fonts
